# Supplementary material
Source: publisher site journal article supplement (https://www.degruyter.com/publication/journal_key/MATH/downloadAsset/MATH_CFP_Number_Theory_Combinatorics_and_their_Applications.pdf)
Supplement: Supplementary file 1 [file MATH_CFP_Number_Theory_Combinatorics_and_their_Applications.pdf]

# NUMBER THEORY, COMBINATORICS, AND THEIR APPLICATIONS

Special Issue in Open Mathematics

## GUEST EDITOR

**Taekyun Kim** (lead Guest Editor), Kwangwoon University, Seoul, Korea; e-mail: [tkkim@kw.ac.kr](mailto:tkkim@kw.ac.kr)

**Dae San Kim**, Sogang University, Seoul, Korea; e-mail: [dskim@sogang.ac.kr](mailto:dskim@sogang.ac.kr)

**Dmitry V. Dolgy**, Kwangwoon University, Seoul, Korea; e-mail: [d\\_dol@mail.ru](mailto:d_dol@mail.ru)

## DESCRIPTION

This **special issue** in the journal [Open Mathematics](#) is intended for researchers with an interest in mathematical theory and computational modelling in number theory and combinatorics.

**The goal** is to present theory, methods, and applications of recent/current mathematical theory and computational modelling related to number theory in various area.

Contributions may address (but are not limited) to the following aspects:

- Properties and theories to umbral calculus
- Normal ordering of degenerate integral powers of number operator and its applications
- Poisson random variable related to theory and computational modelling
- p-adic q-integral on  $Z_p$  related to special numbers and polynomials
- Multiple zeta function
- Operational techniques involving special polynomials
- Properties of ordinary and general families of special polynomials
- Applications of degenerate polylogarithmic and polyexponential function

Related keywords: Laguerre polynomials, degenerate Poisson random variable, degenerate Bernstein polynomials, computational modelling in number theory, Dowling lattice, r-truncated Poisson random variables, degenerate binomial random variable, umbral calculus, degenerate umbral calculus, polyexponential function, degenerate poly-Bernoulli polynomials.

Authors are requested to submit their full revised papers complying the general scope of the journal. The submitted papers will undergo the standard peer-review process before they can be accepted. Notification of acceptance will be communicated as we progress with the review process.

## HOW TO SUBMIT

---

Before submission authors should carefully read the [Instruction for Authors](#).

Manuscripts can be written in TeX, LaTeX (the journal's [LATEX template](#) is recommended, but not obligatory). Please note that we do not accept papers in Plain TEX format. Text files can be also submitted as standard DOCUMENT (.DOC) which is acceptable if the submission in LATEX is not possible. **For an initial submission, the authors are strongly advised to upload their entire manuscript, including tables and figures, as a single PDF file.**

All submissions to the Special Issue must be made electronically via **online submission system Editorial Manager**: [www.editorialmanager.com/openmath](http://www.editorialmanager.com/openmath).

All manuscripts will undergo the standard peer-review process (single blind, at least two independent reviewers). When entering the submission via online submission system authors should choose the option/category "*Special Issue on Number Theory, Combinatorics, and their Applications*".

Submission of a manuscript implies that the work described has not been published before and it is not under consideration for publication anywhere else.

**The deadline for submissions is March 31, 2024**, but individual papers will be reviewed and published online on an ongoing basis.

Contributors to the Special Issue will benefit from:

- **fair and constructive peer review**
- **quick online publication** of accepted papers (continuous publication model)
- language correction services for authors from non-English speaking regions
- no limitations on colour figures and word count in published articles
- all articles are freely available to the academic community worldwide without any restrictions
- promotion of published papers to readers and citers
- distribution to open access directories (such as DOAJ) and thousands of libraries worldwide
- **liberal policies on copyrights** (authors retain copyright) and on self-archiving (no embargo periods) ([License to Publish](#) (CC-BY))
- secure archiving by De Gruyter and the independent archiving service [Portico](#)

We are looking forward to your submission!

In case of any questions please contact **Prof. Taekyun Kim**, [tkkim@kw.ac.kr](mailto:tkkim@kw.ac.kr)  
or **Dr. Justyna Żuk** (Managing Editor of Open Mathematics), [Justyna.Zuk@degruyter.com](mailto:Justyna.Zuk@degruyter.com).
